# Supplementary material for: Genetic and pharmacological activation of Hedgehog signaling inhibits osteoclastogenesis and attenuates titanium particle-induced osteolysis partly through suppressing the JNK/c-Fos-NFATc1 cascade
Source: PubMed Central journal article supplement (PMC7295048; doi:10.7150/thno.44793), 2020-05-17
Supplement: thnov10p6638s1.pdf [file thnov10p6638s1.pdf]

**Table S1. Nucleotide sequences of primers used for qPCR analyses in this study.**

| Gene            | Primer sequences (5'-3') |                             |
|-----------------|--------------------------|-----------------------------|
| <i>Sufu</i>     | Forward                  | GACGGTTCTAACCTGAGCGG        |
|                 | Reverse                  | AGATGCTCCGGCTATCCTCT        |
| <i>Gli1</i>     | Forward                  | CCAAGCCAACCTTTATGTCAGGG     |
|                 | Reverse                  | AGCCCGCTTCTTTGTTAATTTGA     |
| <i>Ptch1</i>    | Forward                  | GCCTTGGCTGTGGGATTAAAG       |
|                 | Reverse                  | CTTCTCCTATCTTCTGACGGGT      |
| <i>Nfatc1</i>   | Forward                  | CAACGCCCTGACCACCGATAG       |
|                 | Reverse                  | GGCTGCCTTCCGTCTCATAGT       |
| <i>C-fos</i>    | Forward                  | TTGCTGATGCTCTTGACTGG        |
|                 | Reverse                  | GGATTTGACTGGAGGTCTGC        |
| <i>Ctsk</i>     | Forward                  | ACGGAGGCATTGACTCTGAAGATG    |
|                 | Reverse                  | GGAAGCACCAACGAGAGGAGAAAT    |
| <i>Dcstamp</i>  | Forward                  | TCCTCCATGAACAAACAGTTCCAA    |
|                 | Reverse                  | AGACGTGGTTTAGGAATGCAGCTC    |
| <i>Acp5</i>     | Forward                  | TGTGGCCATCTTTATGCT          |
|                 | Reverse                  | GTCATTTCTTTGGGGCTT          |
| <i>Oscar</i>    | Forward                  | CTGCTGGTAACGGATCAGCTCCCCAGA |
|                 | Reverse                  | CCAAGGAGCCAGAACCTTCGAAACT   |
| <i>Atp6v0a3</i> | Forward                  | GGACCATATCCCTTTGGCATT       |
|                 | Reverse                  | AAAGCTCAGGTGGTTCGTGG        |
| <i>Atp6v0d2</i> | Forward                  | GTGAGACCTTGAAGACCTGAA       |
|                 | Reverse                  | GAGAAATGTGCTCAGGGGCT        |
| <i>Rn18s</i>    | Forward                  | CGGCTACCACATCCAAGGAA        |
|                 | Reverse                  | GCTGGAATTACCGCGGCT          |

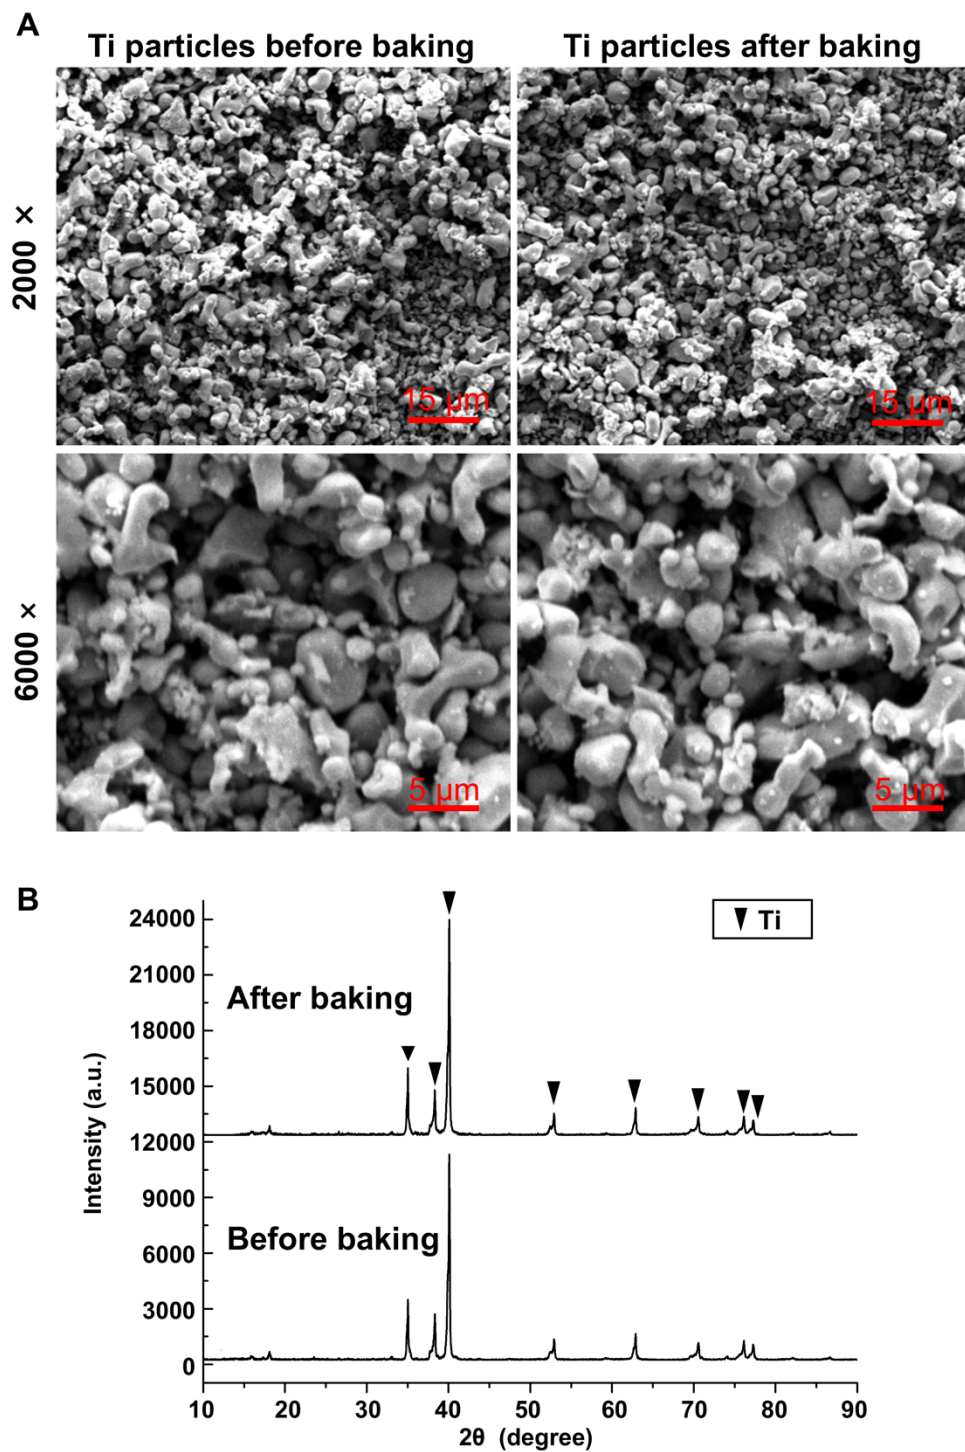

**Figure S1. Characterization of Ti particles before and after 6 hours of baking at 180 °C. (A)** Representative SEM images showing the morphology of Ti particles before (left panels) and after (right panels) the baking treatment. **(B)** X-ray diffraction (XRD) patterns of Ti particles before (bottom) and after (top) 6 hours of baking at 180 °C.

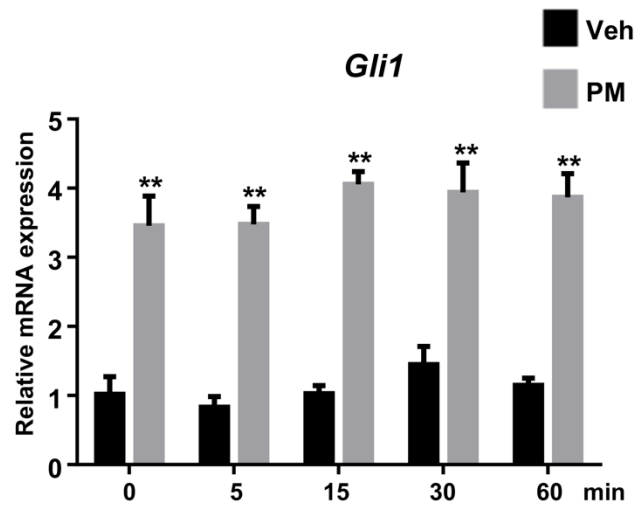

**Figure S2.** qPCR analysis of relative mRNA levels of *Gli1* in BMMs pretreated with vehicle or 2  $\mu$ M PM for 4 h, and then stimulated with 50 ng/ml RANKL for indicated times in the absence or presence of 2  $\mu$ M PM. *Gli1* expression was normalized by 18S ribosomal RNA. The relative changes in mRNA level were analyzed by  $2^{-\Delta\Delta CT}$  method. All values were calculated from three independent biological replicates and presented as mean  $\pm$  SD. \*\* $P < 0.01$ , compared with vehicle-treated group.
